# Supplementary material
Source: PubMed Central journal article supplement (PMC3909504)
Supplement: NIHMS539414-supplement-Supplementary_Information_1.pdf [file NIHMS539414-supplement-Supplementary_Information_1.pdf]

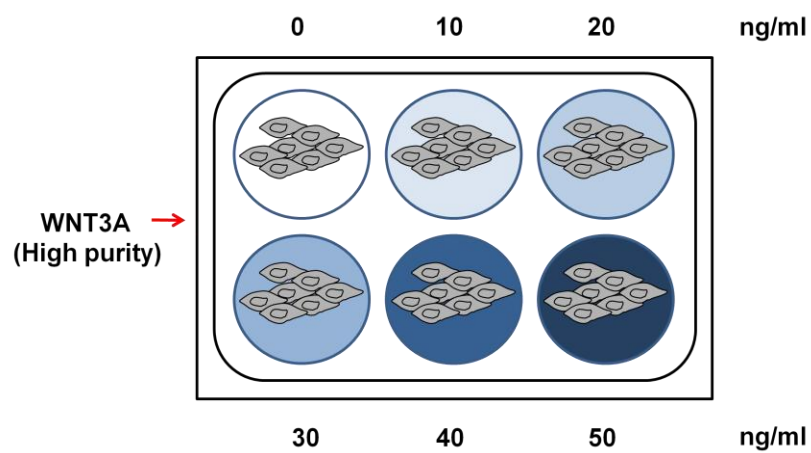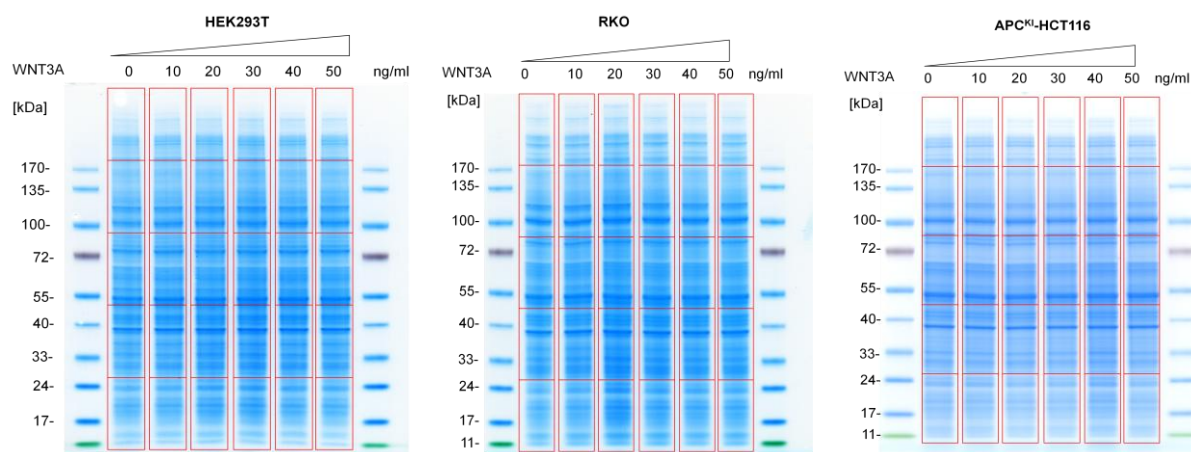

**Supplementary Figure 1** Experimental design and SDS-PAGE 1D protein fractionation

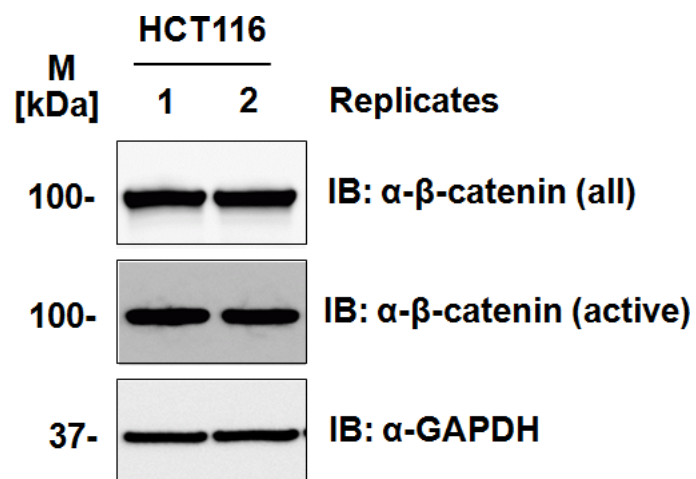

**Supplementary Figure 2.** HCT116 whole cell-lysates subjected to SDS-PAGE followed by immunoblotting with anti- $\beta$ -catenin antisera or anti-active- $\beta$ -catenin. M refers to standard protein marker.
